# Supplementary material for: Protocol for developing a Database of Zoonotic disease Research in India (DoZooRI)
Source: PubMed Central journal article supplement — BMJ Open. 2017 Dec 10;7(12):e017825. doi: 10.1136/bmjopen-2017-017825 (PMC5778271; doi:10.1136/bmjopen-2017-017825), 2017-12-10
Supplement: bmjopen-2017-017825supp001.pdf [file bmjopen-2017-017825supp001.pdf]

1 **Appendix 1: Search Strategy for PubMed**

2 **Anthrax**

| #  | Searches                                                                       |  |
|----|--------------------------------------------------------------------------------|--|
| #1 | "Anthrax"[Mesh] OR "Anthrax Vaccines"[Mesh] OR anthrax OR (bacillus anthracis) |  |
| #2 | India[Mesh] OR India                                                           |  |
| #3 | #1 AND #2                                                                      |  |

3

4 **Brucellosis**

| #  | Searches                                                           |  |
|----|--------------------------------------------------------------------|--|
| #1 | brucell* OR (Malta Fever) OR (undulant fever) or brucellosis[mesh] |  |
| #2 | India[Mesh] OR India                                               |  |
| #3 | #1 AND #2                                                          |  |

5

6

7 **Bovine TB**

| #  | Searches                                                                                   |  |
|----|--------------------------------------------------------------------------------------------|--|
| #1 | ((bovine or zoono*) AND (tuberculosis OR "tuberculosis"[MeSH]) ) OR "mycobacterium bovis") |  |
| #2 | India[Mesh] OR India                                                                       |  |
| #3 | #1 AND #2                                                                                  |  |

8

9

10

11 **Rabies**

| #  | Searches                                                   |  |
|----|------------------------------------------------------------|--|
| #1 | Rabies [MeSH] OR Rabies Vaccines [Mesh] OR rabies OR rabid |  |
| #2 | India[Mesh] OR India                                       |  |
| #3 | #1 AND #2                                                  |  |

12

13  
14  
15  
16

Cysticercosis

| #  | Searches                                                                  |  |
|----|---------------------------------------------------------------------------|--|
| #1 | cysticercosis[MeSH] OR cysticerc* OR neurocysticer* OR taeni* OR tapeworm |  |
| #2 | India[Mesh] OR India                                                      |  |
| #3 | #1 AND #2                                                                 |  |

17  
18  
19  
20

Leptospirosis

| #  | Searches                                                                                                                                                                                                                                                                 |  |
|----|--------------------------------------------------------------------------------------------------------------------------------------------------------------------------------------------------------------------------------------------------------------------------|--|
| #1 | Leptospirosis[Mesh] OR Leptospira[Mesh] OR leptospir* OR (weil* disease) OR infectious icterus OR canicola OR mud fever OR field fever OR (rat catcher* adj yellow*) OR pretibial fever OR grippotyphosa or icteroh* OR (spirochaet* jaundice) OR (spirochete* jaundice) |  |
| #2 | India[Mesh] OR India                                                                                                                                                                                                                                                     |  |
| #3 | #1 AND #2                                                                                                                                                                                                                                                                |  |

21  
22  
23  
24

Salmonellosis

| #  | Searches                                                                                                                                                                                                                                                  |  |
|----|-----------------------------------------------------------------------------------------------------------------------------------------------------------------------------------------------------------------------------------------------------------|--|
| #1 | "Salmonella Infections"[Mesh] OR "Salmonella Food Poisoning"[Mesh] OR "Salmonella Vaccines"[Mesh] OR "Salmonella typhi"[Mesh] OR typhoid OR "typhoid fever" OR "enteric fever" OR "Salmonella typhi" OR "Salmonella enterica" OR paratyphoid OR paratyphi |  |
| #2 | India[Mesh] OR India                                                                                                                                                                                                                                      |  |
| #3 | #1 AND #2                                                                                                                                                                                                                                                 |  |

25

26 Japanese Encephalitis

27

| #  | Searches                                                          |  |
|----|-------------------------------------------------------------------|--|
| #1 | "Encephalitis, Japanese"[Mesh] OR " Japanese encephalitis" OR JBE |  |
| #2 | India[Mesh] OR India                                              |  |
| #3 | #1 AND #2                                                         |  |

28

29 Rickettsia Infections

30

| #  | Searches                                                                                                                                                                                                                                                                           |  |
|----|------------------------------------------------------------------------------------------------------------------------------------------------------------------------------------------------------------------------------------------------------------------------------------|--|
| #1 | "Rickettsia Infections"[Mesh] OR "Typhus, Epidemic Louse-Borne"[Mesh] OR "Typhus, Epidemic Louse-Borne"[Mesh] OR "Rocky Mountain Spotted Fever"[Mesh] OR "Boutonneuse Fever"[Mesh] OR typhus OR "rickettsial pox" OR "trench fever" OR "Q fever" OR "rocky mountain spotted fever" |  |
| #2 | India[Mesh] OR India                                                                                                                                                                                                                                                               |  |
| #3 | #1 AND #2                                                                                                                                                                                                                                                                          |  |

31

32

## 33 Appendix 2: Search Strategy for CINAHL

34 Leptosiprosis

35

| #  | Searches                                                                                                                                                                                                                                              |  |
|----|-------------------------------------------------------------------------------------------------------------------------------------------------------------------------------------------------------------------------------------------------------|--|
| #1 | (MM "Leptospirosis") OR leptospir* OR (weil* disease) OR infectious icterus OR canicola OR mud fever OR field fever OR (rat catcher* adj yellow*) OR pretibial fever OR grippotyphosa or icteroh* OR (spirochaet* jaundice) OR (spirochete* jaundice) |  |
| #2 | (MH "India") OR India                                                                                                                                                                                                                                 |  |
| #3 | #1 AND #2                                                                                                                                                                                                                                             |  |

36

37

38 Rabies

| #  | Searches                                                  |  |
|----|-----------------------------------------------------------|--|
| #1 | (MM "Rabies Vaccine") OR (MM "Rabies") OR rabies OR rabid |  |
| #2 | (MH "India") OR India                                     |  |
| #3 | #1 AND #2                                                 |  |

39

40

41 Anthrax

| #  | Searches                                                                      |  |
|----|-------------------------------------------------------------------------------|--|
| #1 | (MM "Anthrax+") OR (MM "Anthrax Vaccines") OR anthrax OR (bacillus anthracis) |  |
| #2 | (MH "India") OR India                                                         |  |
| #3 | #1 AND #2                                                                     |  |

42

43 Brucellosis

| #  | Searches                                                            |  |
|----|---------------------------------------------------------------------|--|
| #1 | (MM "Brucellosis") OR brucell* OR (Malta Fever) OR (undulant fever) |  |
| #2 | (MH "India") OR India                                               |  |
| #3 | #1 AND #2                                                           |  |

44

45 Cysticercosis

46

| #  | Searches                                                                   |  |
|----|----------------------------------------------------------------------------|--|
| #1 | (MM "Cysticercosis") OR cysticerc* OR neurocysticer* OR taeni* OR tapeworm |  |
| #2 | (MH "India") OR India                                                      |  |
| #3 | #1 AND #2                                                                  |  |

47

48 Salmonellosis

| #  | Searches                                                            |  |
|----|---------------------------------------------------------------------|--|
| #1 | (MM "Salmonella") OR (MM "Salmonella Vaccines+") OR (MM "Salmonella |  |

|    |                                                                                                                                                                       |  |
|----|-----------------------------------------------------------------------------------------------------------------------------------------------------------------------|--|
|    | Infections+") OR (MM "Paratyphoid Fever") OR typhoid OR "typhoid fever" OR "enteric fever" OR "Salmonella typhi" OR "Salmonella enterica" OR paratyphoid OR paratyphi |  |
| #2 | (MH "India") OR India                                                                                                                                                 |  |
| #3 | #1 AND #2                                                                                                                                                             |  |

49

50 Bovine TB

|    |                                                                                           |  |
|----|-------------------------------------------------------------------------------------------|--|
| #  | Searches                                                                                  |  |
| #1 | (( (bovine or zoono*) AND (tuberculosis OR MH "tuberculosis") ) OR "mycobacterium bovis") |  |
| #2 | (MH "India") OR India                                                                     |  |
| #3 | #1 AND #2                                                                                 |  |

51

52 Japanese Encephalitis

53

|    |                                                                                                                    |  |
|----|--------------------------------------------------------------------------------------------------------------------|--|
| #  | Searches                                                                                                           |  |
| #1 | (MM "Encephalitis Viruses, Japanese+") OR (MM "Japanese Encephalitis Vaccines") OR " Japanese encephalitis" OR JBE |  |
| #2 | (MH "India") OR India                                                                                              |  |
| #3 | #1 AND #2                                                                                                          |  |

54

55 Rickettsial Infections

56

|    |                                                                                                                                                                                        |  |
|----|----------------------------------------------------------------------------------------------------------------------------------------------------------------------------------------|--|
| #  | Searches                                                                                                                                                                               |  |
| #1 | (MM "Rickettsial Infections+") OR (MM "Rocky Mountain Spotted Fever") OR (MM "Typhus") OR typhus OR "rickettsial pox" OR "trench fever" OR "Q fever" OR "rocky mountain spotted fever" |  |
| #2 | (MH "India") OR India                                                                                                                                                                  |  |
| #3 | #1 AND #2                                                                                                                                                                              |  |

57

58

59

60 **Appendix 3: Search Strategy for Global Health**

61 Leptosiprosis

62

| #  | Searches                                                                                                                                                                                                                                                                                                                                                                                                                                                                                                                                                                                                                                                                                                                       |  |
|----|--------------------------------------------------------------------------------------------------------------------------------------------------------------------------------------------------------------------------------------------------------------------------------------------------------------------------------------------------------------------------------------------------------------------------------------------------------------------------------------------------------------------------------------------------------------------------------------------------------------------------------------------------------------------------------------------------------------------------------|--|
| #1 | (DE "leptospirosis" OR DE "Leptospira" ) OR leptospir* OR (weil* disease) OR infectious icterus OR canicola OR mud fever OR field fever OR (rat catcher* adj yellow*) OR pretibial fever OR grippotyphosa or icteroh* OR (spirochaet* jaundice) OR (spirochete* jaundice)                                                                                                                                                                                                                                                                                                                                                                                                                                                      |  |
| #2 | DE "India" OR DE "Arunachal Pradesh" OR DE "Assam" OR DE "Bihar" OR DE "Chandigarh" OR DE "Chhattisgarh" OR DE "Dadra and Nagar Haveli" OR DE "Daman and Diu" OR DE "Delhi" OR DE "Goa" OR DE "Gujarat" OR DE "Haryana" OR DE "Himachal Pradesh" OR DE "Jammu and Kashmir" OR DE "Jharkhand" OR DE "Karnataka" OR DE "Kerala" OR DE "Lakshadweep" OR DE "Madhya Pradesh" OR DE "Maharashtra" OR DE "Manipur" OR DE "Meghalaya" OR DE "Mizoram" OR DE "Nagaland" OR DE "Orissa" OR DE "Puducherry" OR DE "Punjab (India)" OR DE "Rajasthan" OR DE "Sikkim" OR DE "Tamil Nadu" OR DE "Andaman and Nicobar Islands" OR DE "Andhra Pradesh" OR DE "Tripura" OR DE "Uttar Pradesh" OR DE "Uttarakhand" OR DE "West Bengal" OR India |  |
| #3 | #1 AND #2                                                                                                                                                                                                                                                                                                                                                                                                                                                                                                                                                                                                                                                                                                                      |  |

63

64

65 Rabies

| #  | Searches                                                                                                                                                                                                                                                                         |  |
|----|----------------------------------------------------------------------------------------------------------------------------------------------------------------------------------------------------------------------------------------------------------------------------------|--|
| #1 | DE "rabies" OR rabies OR rabid                                                                                                                                                                                                                                                   |  |
| #2 | DE "India" OR DE "Arunachal Pradesh" OR DE "Assam" OR DE "Bihar" OR DE "Chandigarh" OR DE "Chhattisgarh" OR DE "Dadra and Nagar Haveli" OR DE "Daman and Diu" OR DE "Delhi" OR DE "Goa" OR DE "Gujarat" OR DE "Haryana" OR DE "Himachal Pradesh" OR DE "Jammu and Kashmir" OR DE |  |

|    |                                                                                                                                                                                                                                                                                                                                                                                                                                               |  |
|----|-----------------------------------------------------------------------------------------------------------------------------------------------------------------------------------------------------------------------------------------------------------------------------------------------------------------------------------------------------------------------------------------------------------------------------------------------|--|
|    | "Jharkhand" OR DE "Karnataka" OR DE "Kerala" OR DE "Lakshadweep" OR DE "Madhya Pradesh" OR DE "Maharashtra" OR DE "Manipur" OR DE "Meghalaya" OR DE "Mizoram" OR DE "Nagaland" OR DE "Orissa" OR DE "Puducherry" OR DE "Punjab (India)" OR DE "Rajasthan" OR DE "Sikkim" OR DE "Tamil Nadu" OR DE "Andaman and Nicobar Islands" OR DE "Andhra Pradesh" OR DE "Tripura" OR DE "Uttar Pradesh" OR DE "Uttarakhand" OR DE "West Bengal" OR India |  |
| #3 | #1 AND #2                                                                                                                                                                                                                                                                                                                                                                                                                                     |  |

66

67

68 Anthrax

| #  | Searches                                                                                                                                                                                                                                                                                                                                                                                                                                                                                                                                                                                                                                                                                                                       |  |
|----|--------------------------------------------------------------------------------------------------------------------------------------------------------------------------------------------------------------------------------------------------------------------------------------------------------------------------------------------------------------------------------------------------------------------------------------------------------------------------------------------------------------------------------------------------------------------------------------------------------------------------------------------------------------------------------------------------------------------------------|--|
| #1 | DE "anthrax" OR DE "cutaneous anthrax" OR DE "inhalational anthrax" OR anthrax OR "anthrax bacillus"                                                                                                                                                                                                                                                                                                                                                                                                                                                                                                                                                                                                                           |  |
| #2 | DE "India" OR DE "Arunachal Pradesh" OR DE "Assam" OR DE "Bihar" OR DE "Chandigarh" OR DE "Chhattisgarh" OR DE "Dadra and Nagar Haveli" OR DE "Daman and Diu" OR DE "Delhi" OR DE "Goa" OR DE "Gujarat" OR DE "Haryana" OR DE "Himachal Pradesh" OR DE "Jammu and Kashmir" OR DE "Jharkhand" OR DE "Karnataka" OR DE "Kerala" OR DE "Lakshadweep" OR DE "Madhya Pradesh" OR DE "Maharashtra" OR DE "Manipur" OR DE "Meghalaya" OR DE "Mizoram" OR DE "Nagaland" OR DE "Orissa" OR DE "Puducherry" OR DE "Punjab (India)" OR DE "Rajasthan" OR DE "Sikkim" OR DE "Tamil Nadu" OR DE "Andaman and Nicobar Islands" OR DE "Andhra Pradesh" OR DE "Tripura" OR DE "Uttar Pradesh" OR DE "Uttarakhand" OR DE "West Bengal" OR India |  |
| #3 | #1 AND #2                                                                                                                                                                                                                                                                                                                                                                                                                                                                                                                                                                                                                                                                                                                      |  |

69

70 Brucellosis

| # | Searches |  |
|---|----------|--|
|---|----------|--|

|    |                                                                                                                                                                                                                                                                                                                                                                                                                                                                                                                                                                                                                                                                                                                                |  |
|----|--------------------------------------------------------------------------------------------------------------------------------------------------------------------------------------------------------------------------------------------------------------------------------------------------------------------------------------------------------------------------------------------------------------------------------------------------------------------------------------------------------------------------------------------------------------------------------------------------------------------------------------------------------------------------------------------------------------------------------|--|
| #1 | DE "brucellosis" OR DE "Brucella" OR brucell* OR (Malta Fever) OR (undulant fever)                                                                                                                                                                                                                                                                                                                                                                                                                                                                                                                                                                                                                                             |  |
| #2 | DE "India" OR DE "Arunachal Pradesh" OR DE "Assam" OR DE "Bihar" OR DE "Chandigarh" OR DE "Chhattisgarh" OR DE "Dadra and Nagar Haveli" OR DE "Daman and Diu" OR DE "Delhi" OR DE "Goa" OR DE "Gujarat" OR DE "Haryana" OR DE "Himachal Pradesh" OR DE "Jammu and Kashmir" OR DE "Jharkhand" OR DE "Karnataka" OR DE "Kerala" OR DE "Lakshadweep" OR DE "Madhya Pradesh" OR DE "Maharashtra" OR DE "Manipur" OR DE "Meghalaya" OR DE "Mizoram" OR DE "Nagaland" OR DE "Orissa" OR DE "Puducherry" OR DE "Punjab (India)" OR DE "Rajasthan" OR DE "Sikkim" OR DE "Tamil Nadu" OR DE "Andaman and Nicobar Islands" OR DE "Andhra Pradesh" OR DE "Tripura" OR DE "Uttar Pradesh" OR DE "Uttarakhand" OR DE "West Bengal" OR India |  |
| #3 | #1 AND #2                                                                                                                                                                                                                                                                                                                                                                                                                                                                                                                                                                                                                                                                                                                      |  |

71

72 Cysticercosis

73

| #  | Searches                                                                                                                                                                                                                                                                                                                                                                                                                                                                                                                                                                                                                                                                                             |  |
|----|------------------------------------------------------------------------------------------------------------------------------------------------------------------------------------------------------------------------------------------------------------------------------------------------------------------------------------------------------------------------------------------------------------------------------------------------------------------------------------------------------------------------------------------------------------------------------------------------------------------------------------------------------------------------------------------------------|--|
| #1 | DE "cysticercosis" OR DE "neurocysticercosis" OR cysticerc* OR neurocysticer* OR taeni* OR tapeworm                                                                                                                                                                                                                                                                                                                                                                                                                                                                                                                                                                                                  |  |
| #2 | DE "India" OR DE "Arunachal Pradesh" OR DE "Assam" OR DE "Bihar" OR DE "Chandigarh" OR DE "Chhattisgarh" OR DE "Dadra and Nagar Haveli" OR DE "Daman and Diu" OR DE "Delhi" OR DE "Goa" OR DE "Gujarat" OR DE "Haryana" OR DE "Himachal Pradesh" OR DE "Jammu and Kashmir" OR DE "Jharkhand" OR DE "Karnataka" OR DE "Kerala" OR DE "Lakshadweep" OR DE "Madhya Pradesh" OR DE "Maharashtra" OR DE "Manipur" OR DE "Meghalaya" OR DE "Mizoram" OR DE "Nagaland" OR DE "Orissa" OR DE "Puducherry" OR DE "Punjab (India)" OR DE "Rajasthan" OR DE "Sikkim" OR DE "Tamil Nadu" OR DE "Andaman and Nicobar Islands" OR DE "Andhra Pradesh" OR DE "Tripura" OR DE "Uttar Pradesh" OR DE "Uttarakhand" OR |  |



|    |                           |  |
|----|---------------------------|--|
|    | DE "West Bengal" OR India |  |
| #3 | #1 AND #2                 |  |

74

75 Salmonellosis

| #  | Searches                                                                                                                                                                                                                                                                                                                                                                                                                                                                                                                                                                                                                                                                                                                       |  |
|----|--------------------------------------------------------------------------------------------------------------------------------------------------------------------------------------------------------------------------------------------------------------------------------------------------------------------------------------------------------------------------------------------------------------------------------------------------------------------------------------------------------------------------------------------------------------------------------------------------------------------------------------------------------------------------------------------------------------------------------|--|
| #1 | DE "typhoid" OR DE "salmonellosis" OR DE "enteric fevers" OR DE "paratyphoid" OR typhoid OR "enteric fever" OR paratyphityphoid OR paratyphoid                                                                                                                                                                                                                                                                                                                                                                                                                                                                                                                                                                                 |  |
| #2 | DE "India" OR DE "Arunachal Pradesh" OR DE "Assam" OR DE "Bihar" OR DE "Chandigarh" OR DE "Chhattisgarh" OR DE "Dadra and Nagar Haveli" OR DE "Daman and Diu" OR DE "Delhi" OR DE "Goa" OR DE "Gujarat" OR DE "Haryana" OR DE "Himachal Pradesh" OR DE "Jammu and Kashmir" OR DE "Jharkhand" OR DE "Karnataka" OR DE "Kerala" OR DE "Lakshadweep" OR DE "Madhya Pradesh" OR DE "Maharashtra" OR DE "Manipur" OR DE "Meghalaya" OR DE "Mizoram" OR DE "Nagaland" OR DE "Orissa" OR DE "Puducherry" OR DE "Punjab (India)" OR DE "Rajasthan" OR DE "Sikkim" OR DE "Tamil Nadu" OR DE "Andaman and Nicobar Islands" OR DE "Andhra Pradesh" OR DE "Tripura" OR DE "Uttar Pradesh" OR DE "Uttarakhand" OR DE "West Bengal" OR India |  |
| #3 | #1 AND #2                                                                                                                                                                                                                                                                                                                                                                                                                                                                                                                                                                                                                                                                                                                      |  |

76

77 Bovine TB

| #  | Searches                                                                                                                                                                                                                                                                         |  |
|----|----------------------------------------------------------------------------------------------------------------------------------------------------------------------------------------------------------------------------------------------------------------------------------|--|
| #1 | (( (bovine or zoono*) AND (tuberculosis OR DE "tuberculosis") ) OR "mycobacterium bovis")                                                                                                                                                                                        |  |
| #2 | DE "India" OR DE "Arunachal Pradesh" OR DE "Assam" OR DE "Bihar" OR DE "Chandigarh" OR DE "Chhattisgarh" OR DE "Dadra and Nagar Haveli" OR DE "Daman and Diu" OR DE "Delhi" OR DE "Goa" OR DE "Gujarat" OR DE "Haryana" OR DE "Himachal Pradesh" OR DE "Jammu and Kashmir" OR DE |  |

|    |                                                                                                                                                                                                                                                                                                                                                                                                                                               |  |
|----|-----------------------------------------------------------------------------------------------------------------------------------------------------------------------------------------------------------------------------------------------------------------------------------------------------------------------------------------------------------------------------------------------------------------------------------------------|--|
|    | "Jharkhand" OR DE "Karnataka" OR DE "Kerala" OR DE "Lakshadweep" OR DE "Madhya Pradesh" OR DE "Maharashtra" OR DE "Manipur" OR DE "Meghalaya" OR DE "Mizoram" OR DE "Nagaland" OR DE "Orissa" OR DE "Puducherry" OR DE "Punjab (India)" OR DE "Rajasthan" OR DE "Sikkim" OR DE "Tamil Nadu" OR DE "Andaman and Nicobar Islands" OR DE "Andhra Pradesh" OR DE "Tripura" OR DE "Uttar Pradesh" OR DE "Uttarakhand" OR DE "West Bengal" OR India |  |
| #3 | #1 AND #2                                                                                                                                                                                                                                                                                                                                                                                                                                     |  |

78

79 Japanese Encephalitis

80

| #  | Searches                                                                                                                                                                                                                                                                                                                                                                                                                                                                                                                                                                                                                                                                                                                       |  |
|----|--------------------------------------------------------------------------------------------------------------------------------------------------------------------------------------------------------------------------------------------------------------------------------------------------------------------------------------------------------------------------------------------------------------------------------------------------------------------------------------------------------------------------------------------------------------------------------------------------------------------------------------------------------------------------------------------------------------------------------|--|
| #1 | DE "Japanese encephalitis" OR " Japanese encephalitis" OR JBE                                                                                                                                                                                                                                                                                                                                                                                                                                                                                                                                                                                                                                                                  |  |
| #2 | DE "India" OR DE "Arunachal Pradesh" OR DE "Assam" OR DE "Bihar" OR DE "Chandigarh" OR DE "Chhattisgarh" OR DE "Dadra and Nagar Haveli" OR DE "Daman and Diu" OR DE "Delhi" OR DE "Goa" OR DE "Gujarat" OR DE "Haryana" OR DE "Himachal Pradesh" OR DE "Jammu and Kashmir" OR DE "Jharkhand" OR DE "Karnataka" OR DE "Kerala" OR DE "Lakshadweep" OR DE "Madhya Pradesh" OR DE "Maharashtra" OR DE "Manipur" OR DE "Meghalaya" OR DE "Mizoram" OR DE "Nagaland" OR DE "Orissa" OR DE "Puducherry" OR DE "Punjab (India)" OR DE "Rajasthan" OR DE "Sikkim" OR DE "Tamil Nadu" OR DE "Andaman and Nicobar Islands" OR DE "Andhra Pradesh" OR DE "Tripura" OR DE "Uttar Pradesh" OR DE "Uttarakhand" OR DE "West Bengal" OR India |  |
| #3 | #1 AND #2                                                                                                                                                                                                                                                                                                                                                                                                                                                                                                                                                                                                                                                                                                                      |  |

81

82 Rickettsial Infections

83

| # | Searches |  |
|---|----------|--|
|---|----------|--|

|    |                                                                                                                                                                                                                                                                                                                                                                                                                                                                                                                                                                                                                                                                                                                                |  |
|----|--------------------------------------------------------------------------------------------------------------------------------------------------------------------------------------------------------------------------------------------------------------------------------------------------------------------------------------------------------------------------------------------------------------------------------------------------------------------------------------------------------------------------------------------------------------------------------------------------------------------------------------------------------------------------------------------------------------------------------|--|
| #1 | DE "rickettsial diseases" OR DE "ehrlichioses" OR DE "neorickettsioses" OR DE "African tick bite fever" OR DE "Q fever" OR DE "spotted fever" OR DE "anaplasmoses" OR DE "typhus fevers" OR DE "Q fever" OR DE "spotted fever" OR DE "Mediterranean spotted fever" OR DE "Rocky Mountain spotted fever" OR DE "typhus fevers" OR DE "louse-borne typhus" OR DE "murine typhus" OR DE "scrub typhus" OR typhus OR "rickettsial pox" OR "trench fever" OR "Q fever" OR "rocky mountain spotted fever"                                                                                                                                                                                                                            |  |
| #2 | DE "India" OR DE "Arunachal Pradesh" OR DE "Assam" OR DE "Bihar" OR DE "Chandigarh" OR DE "Chhattisgarh" OR DE "Dadra and Nagar Haveli" OR DE "Daman and Diu" OR DE "Delhi" OR DE "Goa" OR DE "Gujarat" OR DE "Haryana" OR DE "Himachal Pradesh" OR DE "Jammu and Kashmir" OR DE "Jharkhand" OR DE "Karnataka" OR DE "Kerala" OR DE "Lakshadweep" OR DE "Madhya Pradesh" OR DE "Maharashtra" OR DE "Manipur" OR DE "Meghalaya" OR DE "Mizoram" OR DE "Nagaland" OR DE "Orissa" OR DE "Puducherry" OR DE "Punjab (India)" OR DE "Rajasthan" OR DE "Sikkim" OR DE "Tamil Nadu" OR DE "Andaman and Nicobar Islands" OR DE "Andhra Pradesh" OR DE "Tripura" OR DE "Uttar Pradesh" OR DE "Uttarakhand" OR DE "West Bengal" OR India |  |
| #3 | #1 AND #2                                                                                                                                                                                                                                                                                                                                                                                                                                                                                                                                                                                                                                                                                                                      |  |

84

85

86

87
